# Supplementary material for: Ultrahigh Pressure Crystallographic Passage Toward Metallic Hydrogen
Source: Research Square preprint supplement (doi:10.21203/rs.3.rs-5080559/v1), 2024-09-23
Supplement: Supplementary file 1 [file fd2159df94ba1aafbc1c44e2.docx]

**Supplemental Information**

**Ultrahigh Pressure Crystallographic Passage Toward Metallic Hydrogen**

Cheng Ji1,2, Bing Li1, Jie Luo3,4, Yongsheng Zhao5,1, Yuan Liu3,4, Konstantin Glazyrin5, Alexander Björling6, Lucas A. B. Marçal6,7, Maik Kahnt6, Sebastian Kalbfleisch6, Wenjun Liu8, Yang Gao1, Junyue Wang1, Wendy L. Mao9,10, Hanyu Liu3,4,11, Yanming Ma3,4,11, Yang Ding1, Wenge Yang1, and Ho-Kwang Mao1,2,*

1Center for High Pressure Science and Technology Advanced Research, Beijing 100094, P. R. China.

2Shanghai Key Laboratory of MFree, Shanghai Advanced Research in Physical Sciences, Pudong, Shanghai 201203, P.R. China.

3Key Laboratory of Material Simulation Methods and Software of Ministry of Education, College of Physics, Jilin University, Changchun 130012, China.

4State Key Laboratory of Superhard Materials, College of Physics, Jilin University, Changchun 130012, China.

5Deutsches Elektronen-Synchrotron, Notkestrasse 85, Hamburg 22607, Germany.

6MAX IV Laboratory, Lund University, Lund 22100, Sweden.

7Brazilian Synchrotron Light Laboratory, Brazilian Center for Research in Energy and Materials, 13083970, Campinas, Brazil.

8Advanced Photon Source, Argonne National Laboratory, Argonne, IL 60439, USA.

9Department of Earth and Planetary Sciences, Stanford University, Stanford, CA, USA.

10Stanford Institute for Materials and Energy Sciences, SLAC National Accelerator Laboratory, Menlo Park, CA, USA.

11International Center of Future Science, Jilin University, Changchun 130012, China.

*maohk@hpstar.ac.cn

**Methods**

***Experimental***

Symmetric DACs were used to generate high pressure, with 30 μm culet size beveled to 300 μm or 250 μm with 8.5° bevel angle. Boehler-Almax type anvils with 41° X-ray opening were used to ensure achieving pressures above 200 GPa while gaining reasonable X-ray opening. A total of more than 40 samples were prepared, with data measured in between 140 GPa and 245 GPa. Hydrogen (H2) gas of 99.999% purity was purchased from Chunyu Special Gases Co., Ltd., Shanghai. H2 was pumped to 0.17 GPa and sealed into DAC sample chambers using a gas loading system at HPSTAR, Shanghai. X-ray transparent composite gaskets made by magnesium oxide powder and epoxy mixture1-3 were used for all samples. This gasket provides clean XRD background which is critical for XRD studies of hydrogen. Sample chambers, originally 10 to 15 µm in diameter, were fabricated by laser drilling on pre-indented gaskets. Hydrogensamples at high pressure above 200 GPa usually remained ~5 µm in diameter. For most samples, a small piece of gold (Au) flake was loaded inside (or near) a sample chamber to function as position marker to precisely align rotation center. To be consistent, pressure was determined using the hydrogen pressure scale which we developed previously1,2.

Synchrotron XRD experiments were attempted at multiple beamlines, including P02.2 (PetraIII, DESY, Germany), NanoMAX (MAX IV Laboratory, Lund University, Sweden), 34-IDE (APS, ANL, USA), and BL15U (SSRF, China). Area detectors and monochromatic X-ray beam were used at all beamlines. At P02.2 (PetraIII, DESY, Germany), X-ray probe with 800 nm FWHM at 25 keV, focused by compound refractive lens (CRL), was used. High precision sample stage systems were used to couple with the nano-probe setups4, which is the key for the success of measuring SXRD data from individual micron-sized crystal grains of hydrogen. A Pekin Elmer (XRD1621) with large area was used for recording XRD signals. SXRD data was also collected by rotating DAC by ±18° by an angular step of 0.1° or 0.2°, with exposure 30s per angle. For some samples without Au position markers, 2-dimensional scans with the rocking as the fast dimension and horizontal translation as the slow dimension need to performed to make sure that XRD signal from a single crystallite can be captured. At the NanoMAX beamline (MAX IV Laboratory, Lund University, Sweden), Kirkpatrick-Baez (KB) mirrors (JTEC, Japan) were used to focus X-rays between 20 keV and 26 keV down to 50 nm to 100 nm (FWHM). A Pilatus 1M detector (DECTRIS, Switzerland) was placed about 15 cm downstream of the focus to record X-ray diffraction (XRD) images. Data was collected by rotating the sample (DAC) by ±18° in angular steps of 0.1° and 0.2° and using exposure times of 30s to 60s per scan point. At 34-ID-E (APS, ANL, USA), a 24 keV X-ray probe with 300 nm FWHM, focused by a JTEC KB mirror pair, was used. A MarCCD165 area detector was used to record XRD signal. SXRD data was collected by rotating DAC by ±18° with an angular step of 0.2° and 30s to 60s exposures per angle. We have to emphasize that due to the long data collection time for a single data set (2 to 6 hr), stability of the beamline setup is crucial for the success of experiment, including stable hutch temperature. In addition, since both crystallite and X-ray probe are small, a good rotation center alignment is also critical. The current alignment is a two-step procedure. First, rough aligning the rotation center by X-ray transmission scan of the Re hole (100 to 150 μm in diameter) is performed. Second, a fine alignment is done by either one-dimensional XRD scan across the sample chamber, or aligning on Au position markers when available. We strongly recommend loading Au position marker, by the help of which, the precision of rotation center alignment can be significantly improved (Fig. S6). This is of vital importance for the SXRD data collection using nano-probe on samples with micron sized grains.

For analyzing *d*-spacings of Bragg peaks, the raw XRD images were integrated using Dioptas5 software (PyFAI based azimuthal integration), and Fityk6 is used for fitting peak positions. Due to the limited number of Bragg peaks from a single crystallite, the data processing must be performed manually, instead of using commercial SXRD data analysis software. The indexation of SXRD data is performed in two steps. We firstly search all peaks which can be indexed into certain crystal grains based on the original *hcp* unit cells. For instance, with a SXRD dataset, we first searched all possible *hcp* (1 0 0), (0 0 2), and (1 0 1) Bragg peaks taking reference of the reported EOS1. Those peaks are relatively strong, and the search of them lays basis for indexations in supercell. The reciprocal space coordinates of all searched peaks are then calculated according to the experimental geometries. The angles between each pair of peaks are calculated and compared to the theoretical values based on measured unit cell parameters and hexagonal lattice. Theoretical angles were calculated following formula (1):

Where *a* and *c* are measured unit cell parameters of the *hcp*-like lattice, *h1*, *k1*, *l1, h2, k2, and l2* are Miller indexes of the two peaks for calculating their angle, , in the reciprocal space. For any pairs of peaks with their angle matches the theoretical values, indexation would be further performed using software Nsingle by inputting a pair of peaks with the corresponding *hcp* Miller indexes as well as the estimated unit cell parameters. Only when one or more predicted peaks based on the UB matrix from indexation got further confirmed by our experimental data, we considered the data being valid SXRD data from one crystallite. Typically, the number of peaks found belonging to one crystallite ranges from 3 to 8. Once a crystallite is confirmed by the above procedure, further indexation by using ✕*a* 2✕*c* supercell would be conducted by assigning the peaks with Miller indexes in the supercell. We would then examine if any predicted peak uniquely belonging to the supercell can be confirmed experimentally. Following such procedures, we found unique supercell peaks in 10 crystal grains.

***Theoretical calculations***

In this work, we performed density functional theory simulations using the VASP code7. The exchange correlation function was chosen as Generalized Gradient Approximation Perdew-Burke-Ernzerhof8 by employing projector-augmented wave method9. We choose energy cutoff of 500 eV and k-point sampling of 2π × 0.048 Å⁻¹. The simulated cells of 72 and 96 hydrogen atoms were used. For investigate dynamics behavior of hydrogen, we performed isothermal-isobaric (NPT) molecular dynamics (MD) simulations at 250 GPa and 300 K, where total run is at least 20,000 steps with a time step of 0.5 fs. As a result of molecular dynamics simulations, together with the MD trajectory (Fig. 4b), it is clearly seen that the simulated structure could be considered as a mixed configuration that contains alternating Br2-like (B) layer and graphene-like (G) layer as reported in previous studies10,11. Furthermore, time-averaging centroids of molecular hydrogen units yield a structure with symmetry space group of *P*. The detailed information on lattice parameter and atomic position could be found in Table 2.

**Table S1**. Angles between pairs of Bragg peaks in the reciprocal space in data measured at 221 GPa and 245 GPa, respectively. angle*obs* and anglecalc represent experiment and calculation values, respectively. Miller indexes belong to the ×*a* 2×*c* hexagonal supercell.

| **221 GPa** | | | | |
| --- | --- | --- | --- | --- |
| *h1k1l1* | *h2k2l2* | angleobs (°) | anglecalc (°) | Difference (°) |
| 1 -2 0 | -1 -1 0 | 60.2 | 60.0 | 0.2 |
| 1 -2 0 | 1 1 0 | 119.5 | 120.0 | -0.5 |
| 1 -2 0 | -1 2 0 | 179.3 | 180.0 | -0.7 |
| 1 -2 0 | 2 0 -1 | 89.8 | 90.0 | -0.2 |
| 1 -2 0 | 0 2 -1 | 147.1 | 147.3 | -0.4 |
| -1 -1 0 | 1 1 0 | 179.6 | 180.0 | -0.4 |
| -1 -1 0 | -1 2 0 | 120.3 | 120.0 | 0.3 |
| -1 -1 0 | 2 0 -1 | 147.4 | 147.3 | 0.1 |
| -1 -1 0 | 0 2 -1 | 147.3 | 147.3 | 0.0 |
| 1 1 0 | -1 2 0 | 59.9 | 60.0 | -0.1 |
| 1 1 0 | 2 0 -1 | 32.2 | 32.7 | -0.5 |
| 1 1 0 | 0 2 -1 | 32.8 | 32.7 | 0.1 |
| -1 2 0 | 2 0 -1 | 89.5 | 90.0 | -0.5 |
| -1 2 0 | 0 2 -1 | 32.1 | 32.7 | -0.6 |
| 2 0 -1 | 0 2 -1 | 58.1 | 58.2 | -0.1 |
| **245 GPa** | | | | |
| *h1k1l1* | *h2k2l2* | angleobs (°) | anglecalc (°) | Difference (°) |
| 1 -1 1 | 0 -1 1 | 53.2 | 53.5 | -0.3 |
| 1 -1 1 | -2 1 0 | 141.0 | 141.2 | -0.2 |
| 1 -1 1 | 1 1 0 | 90.2 | 90.0 | 0.2 |
| 1 -1 1 | 0 2 -1 | 122.7 | 122.7 | 0.0 |
| 0 -1 1 | -2 1 0 | 90.0 | 90.0 | 0.0 |
| 0 -1 1 | 1 1 0 | 141.1 | 141.2 | -0.1 |
| 0 -1 1 | 0 2 -1 | 167.7 | 167.8 | -0.1 |
| -2 1 0 | 1 1 0 | 120.1 | 120.0 | 0.1 |
| -2 1 0 | 0 2 -1 | 90.3 | 90.0 | 0.3 |
| 1 1 0 | 0 2 -1 | 32.5 | 32.7 | -0.2 |








**Fig. S1**. Rocking curves of Bragg peaks measured at 221 GPa (**a** to **f**) and 245 GPa (**g** to **k**). Such sharp rocking curves are typical for hydrogen at two megabar pressures measured using nano-probe. Miller indexes are in the ✕*a* 2✕*c* supercell and consistent to Fig. 2f and 2g.





**Fig. S2**. Unit cell volume (**a**) and cell parameters *a* and *c* (**b**) of H2 in the *P* model between 210 GPa and 245 GPa. Solid symbols represent current data. All fitted lines are obtained from the previous study1. Black dash line in (a) represents the fitted unit cell volume, *V’*, of *hcp*-like unit cell multiplied by six. Red dash line and blue dash line in (b) represent fitted unit cell parameters *a’* and *c’*of *hcp*-like unit cell multiplied by 2 and , respectively.





**Fig. S3**. Simulated XRD pattern based on the *P* model calculated at 250 GPa. Red and blue bars represent calculated intensities. Red bars mark peaks uniquely belonging to the *P* model. Blue bars mark peaks also allowed by the parent *hcp* unit cell. Spheres mark at what pressures the corresponding Bragg peaks were observed. Spheres are only to demonstrate the statistics of observed peaks, and do not reflect the true *d*-spacing of those peaks at their observed pressures.





**Fig. S4**. *c/a* ratio for *hcp*-like unit cell measured at ultrahigh pressures. Symbols represent the current data, and dash lines are fitting curves from literature1. Black and red dash lines are for phase I and phase IV, respectively. Different color of symbols represents different samples.


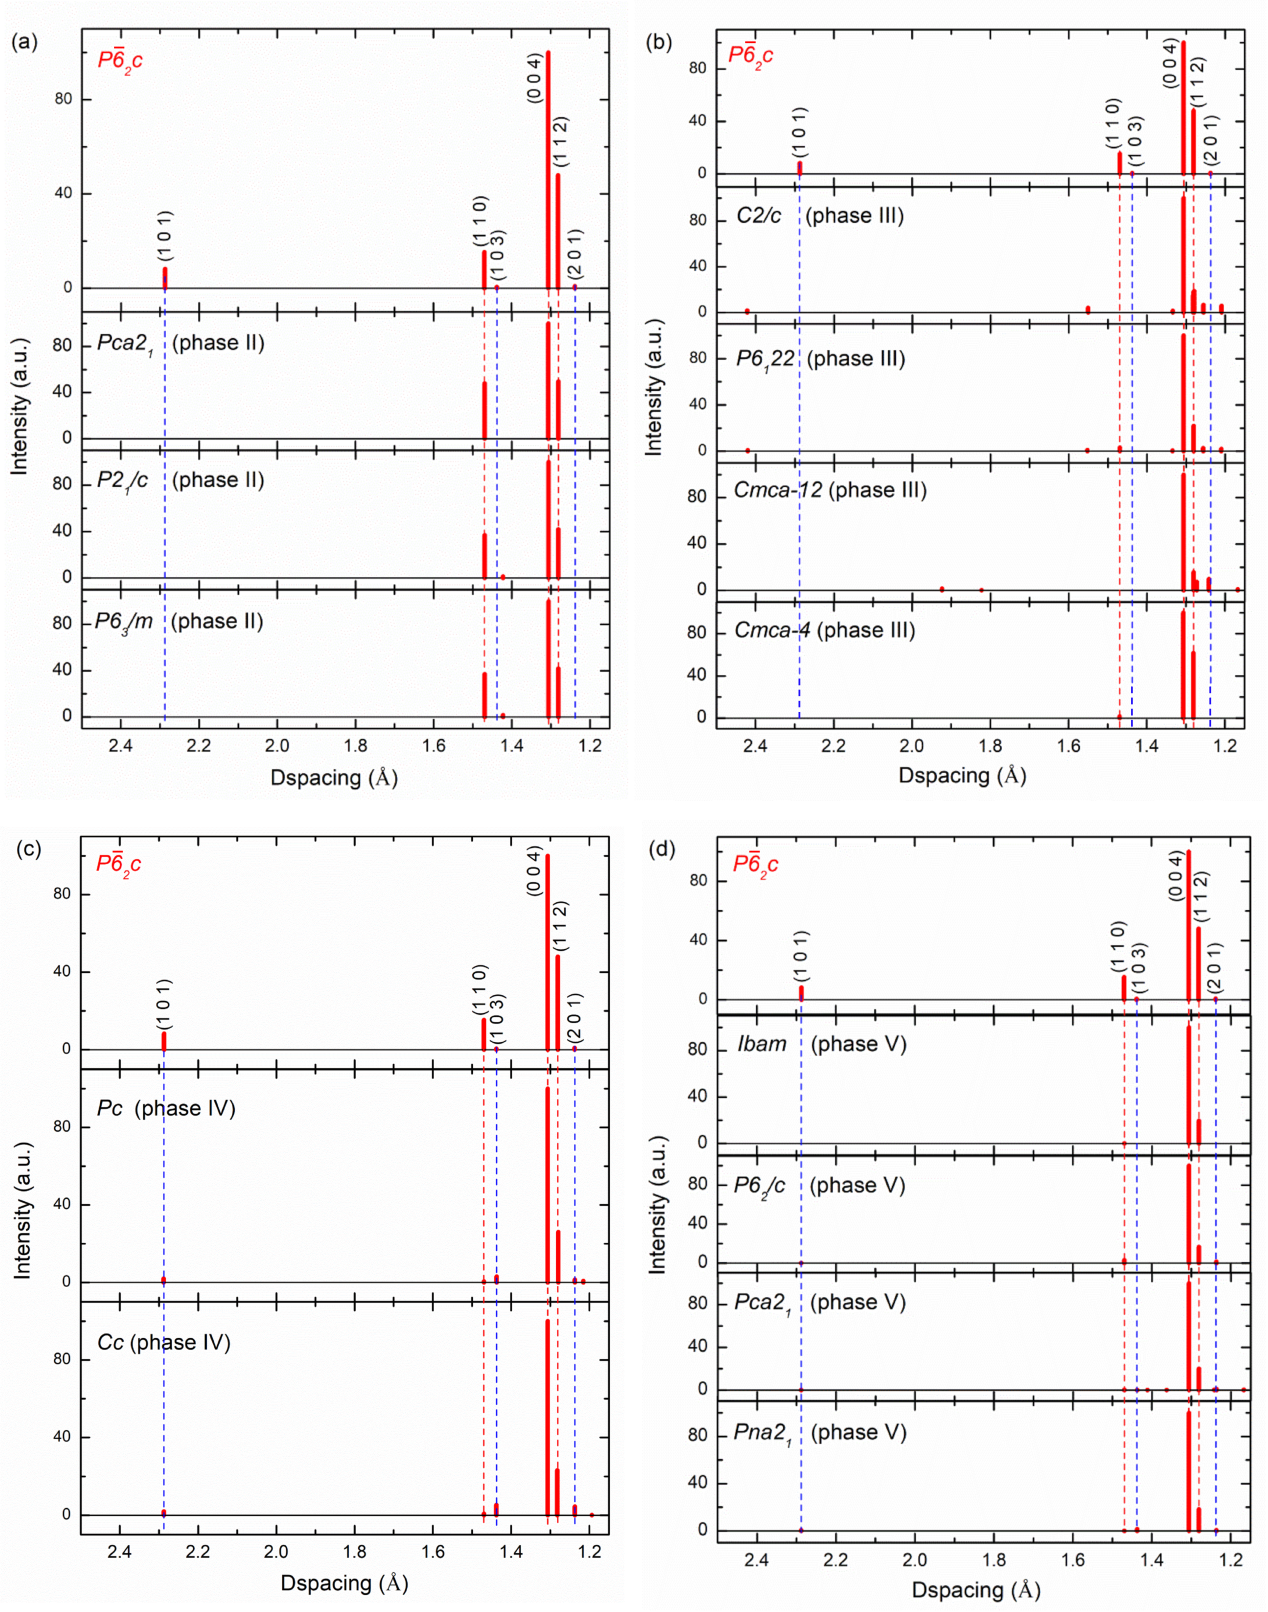


**Fig. S5**. Comparison of Bragg peaks of different structural models in a dspacing range of 1.15 Å to 2.5 Å to that of *P*. Red bars represent intensity of Bragg peaks. Blue dash lines mark unique supercell peaks, red dash lines mark peaks which are also allowed by *hcp­*-like unit cell. Intensities of Bragg peaks were calculated by using software PCW. Since PCW calculates intensity for powder XRD, peak intensity generated by PCW of one peak was then divided by the multiplicity of that peak. Unit cell parameters of all modelswere derived based on *hcp*-like unit cell parameters measured at 245 GPa (*a­0*=1.6969 Å and *c0*= 2.6124 Å), assuming those lattices being perfect supercell of the *hcp* lattice (in reality, most theoretical models are distorted from the perfect supercell geometry). Specifically, the geometry relationships are listed in the following: *Pca21* (phase II), *a=a0  b=a0  c=c0  α*=90.0° *β*=90.0° *γ=*90.0°; *P63/m* (phase II), *a=a0  b=2a0  c=c0 α*=90.0° *β*=90.0° *γ=*120.0°; *P6122* (phase III)*,a=a0  b=a0  c=3c0  α*=90.0° *β*=90.0° *γ=*120.0°; *Ibam* (phase V), *a=a0  b=a0  c=2c0  α*=90.0° *β*=90.0° *γ=*90.0°; *Pc* (phase IV), *a=a0  b=3a0  c=2c0  α*=90.0° *β*=90.0° *γ=*90.0°; *Cc* (phase IV)*,* *a=a0 b=a0 c=2c0 α*=90.0° *β*=90.0° *γ=*120.0°; *Pca21* (phase V) *a=a0  b=3a0  c=2c0  α*=90.0° *β*=90.0° *γ=*90.0°; *P62/c a=a0 b=a0 c=2c0 α*=90.0° *β*=90.0° *γ=*120.0°; *Pna21* (phase V), *a=c0  b=3a0  c=a0  α*=90.0° *β*=90.0° *γ=*90.0°. Atomic coordinates of models from literatures10,12-14 were used to calculate XRD patterns. *P62/c* (phase V) in (d)has very weak (1 0 3) peak, which cannot be displayed in the plotted figure.

**
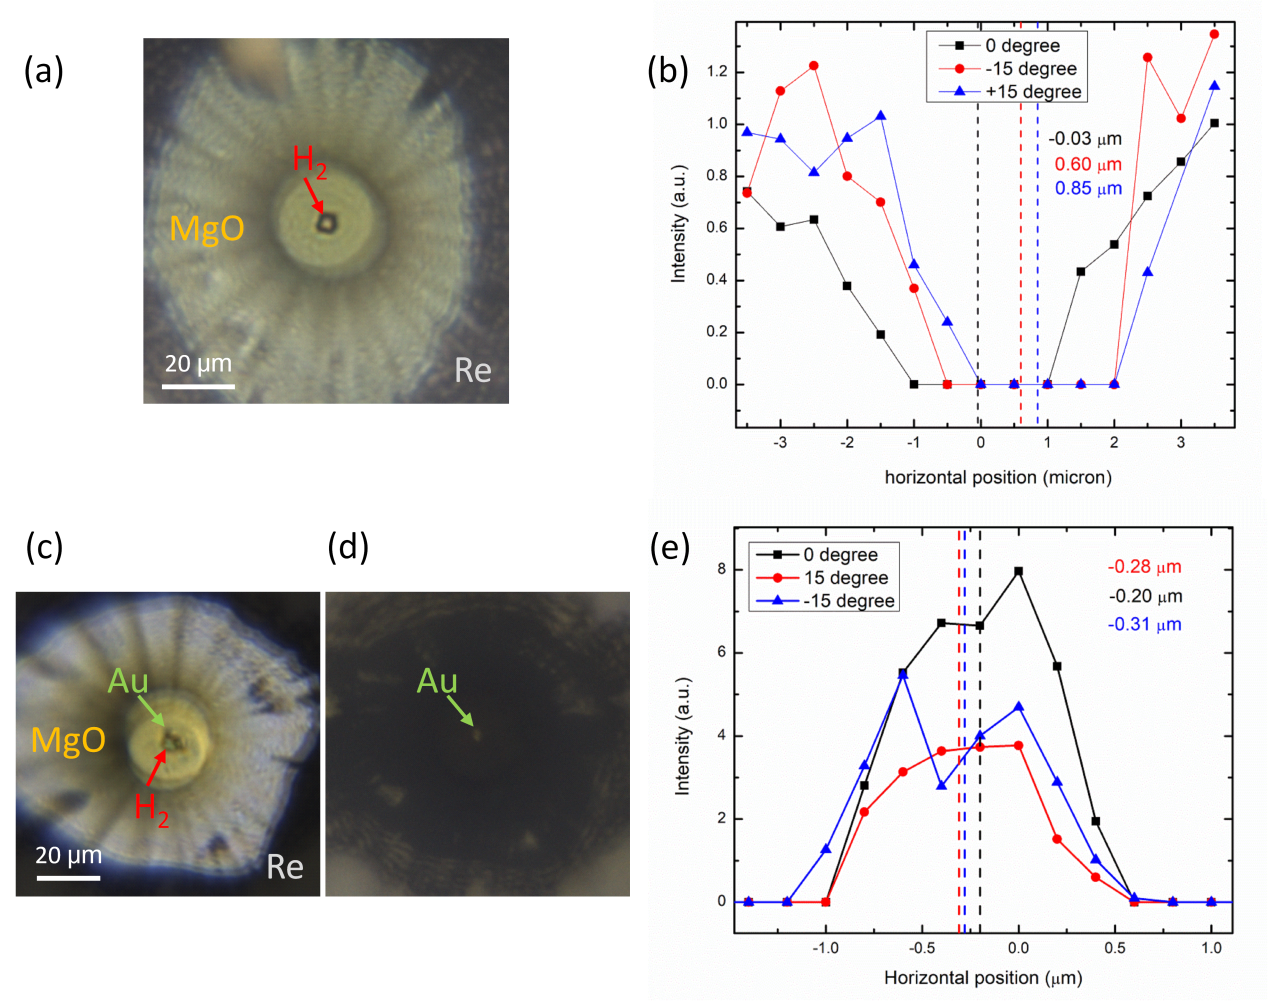
**

**Fig. S6.** Qualities of rotation center alignment with and without Au position marker. (**a**) Micro-image of H2 sealed in MgO-epoxy insert gasket without Au position marker. (**b**) Rotation center alignment by scanning MgO (2 0 0) peak at three different angles. Position with no MgO peak is where H2 is located. Dash lines mark the center positions of H2 at different angles. (**c**) and (**d**) show micro-images of H2 sealed in MgO-epoxy insert gasket with Au position marker with transmitted light and reflected light illumination, respectively. A piece of 2 to 3 μm Au was loaded nearby H2 sample. (**e**) Rotation center alignment by scanning Au (1 1 1) Bragg peak at three different angles. Dash lines mark the center positions of Au at different angles. With Au position marker, the precision of rotation center alignment is significantly improved.

**Reference**

1 Ji, C. *et al.* Ultrahigh-pressure isostructural electronic transitions in hydrogen. *Nature* **573**, 558-562, doi:10.1038/s41586-019-1565-9 (2019).

2 Ji, C. *et al.* Crystallography of Low Z material at Ultrahigh Pressure: Case Study on Solid Hydrogen. *Matter and Radiation at Extremes* **5**, 038401 (2020).

3 Ji, C., Li, B., Yang, W. & Mao, H.-k. Crystallographic Studies of Ultra-dense Solid Hydrogen. *Chinese Journal of High Pressure Physics* **34**, 020101, doi:10.11858/gywlxb.20200520 (2020).

4 Glazyrin, K. *et al.* Sub-micrometer focusing setup for high-pressure crystallography at the Extreme Conditions beamline at PETRA III. *Journal of Synchrotron Radiation* **29**, 654-663 (2022).

5 Prescher, C. & Prakapenka, V. B. DIOPTAS: a program for reduction of two-dimensional X-ray diffraction data and data exploration. *High Pressure Res* **35**, 223-230 (2015).

6 Wojdyr, M. Fityk: a general-purpose peak fitting program. *Journal of Applied Crystallography* **43**, 1126-1128 (2010).

7 Kresse, G. & Furthmu¨ller, J. Efficient iterative schemes for ab initio total-energy calculations using a plane-wave basis set. *PHYSICAL REVIEW B* **54**, 11169-11186 (1996).

8 Perdew, J. P. *et al.* Atoms, molecules, solids, and surfaces: Applications of the generalized gradient approximation for exchange and correlation. *Phys Rev B Condens Matter* **46**, 6671-6687 (1992).

9 Blöchl, P. E. Projector augmented-wave method. *Physical Review B* **50**, 17953-17979 (1994).

10 Liu, H., Zhu, L., Cui, W. & Ma, Y. Room-temperature structures of solid hydrogen at high pressures. *J Chem Phys* **137**, 074501 (2012).

11 Liu, H. & Ma, Y. Proton or Deuteron Transfer in Phase IV of Solid Hydrogen and Deuterium. *Physical Review Letters* **110**, 025903 (2013).

12 Pickard, C. J. & Needs, R. J. Structure of phase III of solid hydrogen. *Nature Physics* **3**, 473-476 (2007).

13 Pickard, C. J., Martinez-Canales, M. & Needs, R. J. Density functional theory study of phase IV of solid hydrogen. *Physical Review B* **85**, 214114, doi:10.1103/PhysRevB.85.214114 (2012).

14 Monserrat, B., Needs, R. J., Gregoryanz, E. & Pickard, C. J. Hexagonal structure of phase III of solid hydrogen. *Physical Review B* **94**, 134101, doi:10.1103/PhysRevB.94.134101 (2016).
